# Supplementary material
Source: PubMed Central journal article supplement (PMC7753490)
Supplement: JGS-69-293-s001.pdf [file JGS-69-293-s001.pdf]

**Supplementary Table S1.** Methods to assess delirium at each study center during COVID-19 emergency.

|                     | <b>Center 1</b> | <b>Center 2</b> | <b>Center 3</b> | <b>Center 4</b> |
|---------------------|-----------------|-----------------|-----------------|-----------------|
| 4AT                 | X               |                 |                 | X               |
| DSM-5 criteria      | X               |                 |                 | X               |
| Clinical impression | X               | X               | X               |                 |
| m-RASS              | X               | X               |                 | X#              |

DSM denotes Diagnostic and Statistical Manual of Mental Disorders, 5<sup>th</sup> edition

m-RASS denotes modified Richmond Agitation and Sedation Scale

The methods to diagnose delirium were different depending on the site and the expertise of the physicians who evaluated delirium.

At center 1, delirium diagnoses were obtained on patient’s admission by a variable medical staff composed by either geriatricians and non-geriatricians. The delirium episodes were thus classified as following: when the diagnosis was obtained by a geriatrician, the diagnosis was made using the 4AT plus DSM-5 criteria and considered as plausible; however when the diagnosis was not obtained by a geriatrician, we considered as delirium all the cases in which the m-RASS score was different than 0. At center 2, the cases of delirium were reclassified by means of the m-RASS score (i.e., a m-RASS score different than 0 was enough to diagnose delirium). At center 4, the diagnosis of delirium was always obtained as in non-emergency situations and the m-RASS score was disregarded in order to re-classify the delirium episodes. (see the text for additional explanations).

**Supplementary Table S2.** Patients' characteristics on admission in the study centers.

| <b>Characteristics on admission</b>               | <b>Center 1<br/>(n = 140)</b> | <b>Center 2<br/>(n = 107)</b> | <b>Center 3<br/>(N = 231)</b> | <b>Center 4<br/>(N=38)</b> |
|---------------------------------------------------|-------------------------------|-------------------------------|-------------------------------|----------------------------|
| Age (median [IQR])                                | 80 [74, 85]                   | 80 [74, 85]                   | 76 [71, 82]                   | 80 [77, 86]                |
| Male gender, n (%)                                | 82 (59)                       | 58 (54)                       | 163 (71)                      | 15 (39)                    |
| Smoking (current or previous), n (%)              | 31 (34)                       | 13 (23)                       | 33 (26)                       | 18 (47)                    |
| Past or current medical history                   |                               |                               |                               |                            |
| Hypertension, n (%)                               | 91 (65)                       | 72 (67)                       | 149 ( 65)                     | 31 ( 82)                   |
| Cardiac diseases, n (%)*                          | 63 (45)                       | 41 (38)                       | 94 ( 41)                      | 14 ( 37)                   |
| Diabetes, n (%)                                   | 44 (31)                       | 20 (19)                       | 65 ( 28)                      | 9 ( 24)                    |
| Chronic respiratory disease, n (%)**              | 16 (11)                       | 15 (14)                       | 25 ( 11)                      | 7 ( 18)                    |
| N chronic diseases (excluding dementia)           | 3 [2, 4]                      | 3 [2, 5]                      | 2 [1, 3]                      | 2 [2, 3]                   |
| Dementia                                          | 29 (21)                       | 22 (21)                       | 29 (12)                       | 5 (13)                     |
| Malnutrition                                      | 27 (24)                       | 13 (13)                       | 0 (0)                         | 2 (6)                      |
| Obesity                                           | 15 (13)                       | 14 (14)                       | 27 (20)                       | 2 (6)                      |
| Drugs (median [IQR])                              | 6 [2, 9]                      | 4 [2, 7]                      | 4 [2, 7]                      | 7 [6, 9]                   |
| Dependence in bathing, n(%)                       | 56 (42)                       | 28 (26)                       | NA                            | NA                         |
| Dependence in dressing, n(%)                      | 50 (38)                       | 27 (25)                       | NA                            | NA                         |
| Barthel Index (pre-admission), (median [IQR])     | NA                            | NA                            | 100 [70, 100]                 | 94 [81, 100]               |
| Functional disability n (%)***                    | 56 (42)                       | 28 (26)                       | 72 ( 32)                      | 16 ( 44)                   |
| Chest X-Ray or CT results, n (%)                  |                               |                               |                               |                            |
| No opacity                                        | 21 (15)                       | 10 ( 9)                       | 8 ( 3)                        | 7 ( 18)                    |
| Single opacity                                    | 35 (25)                       | 25 (23)                       | 8 ( 3)                        | 6 (16)                     |
| Multiple or bilateral opacities                   | 84 (60)                       | 72 (67)                       | 215 ( 93)                     | 25 (66)                    |
| Use of continuous positive airway pressure, n (%) | 28 (20)                       | 8 (7)                         | 14 (6)                        | 3 (8)                      |
| Laboratory serum levels (median [IQR])            |                               |                               |                               |                            |
| White blood cell count (x10 <sup>9</sup> /L)      | 6.5 [4.7, 9.0]                | 8.0 [6.1, 10.6]               | 7.0 [5.0, 9.8]                | 4.7 [3.8, 6.3]             |
| C-reactive protein, mg/dl                         | 7.2 [3.3, 13.2]               | 12.1 [4.6, 17.1]              | 10.7 [5.5, 17.5]              | 1.1 [0.4, 3.0]             |
| Albumin, gr/dl                                    | 3.2 [2.8, 3.5]                | 3.0 [2.8, 3.3]                | 3.1 [2.9, 3.3]                | NA                         |
| Delirium, n (%)                                   | 29 (21)                       | 22 (21)                       | 11 (5)                        | 11 (29)                    |
| m-RASS score, n (%)                               |                               |                               |                               |                            |
| ≤ -1                                              | 23 (16)                       | 13 (12)                       | NA                            | 9 ( 24)                    |
| 0                                                 | 111 (79)                      | 87 (81)                       | NA                            | 27 ( 71)                   |
| ≥ +1                                              | 6 ( 4)                        | 7 ( 7)                        | NA                            | 2 ( 5)                     |

\*Cardiac diseases included congestive heart failure, coronary heart disease and atrial fibrillation.

\*\*Chronic respiratory diseases include chronic obstructive pulmonary disease and asthma.

\*\*\*Functional disability was defined as the presence of dependence in bathing or dressing (for Centers 1 and 2) or a Barthel Index  $\leq 90$  (centers 3 and 4).

IQR = Interquartile range

NA = not available

CT = computed tomography

m-RASS = modified Richmond Agitation and Sedation Scale

**Supplementary Table S3.** Sensitivity analysis on the multivariable logistic model on delirium on admission excluding center 3

|                                                                   | OR (95% CI)      | p-value |
|-------------------------------------------------------------------|------------------|---------|
| Sex (male vs female)                                              | 0.68(0.34;1.38)  | 0.288   |
| Age (for each year)                                               | 1.02(0.97;1.08)  | 0.422   |
| Functional disability (yes vs no)                                 | 1.96(0.75;5.13)  | 0.171   |
| Dementia (present vs absent)                                      | 5.13(1.96;13.43) | 0.001   |
| N. of chronic diseases (excluding dementia)                       | 1.18(1.01;1.39)  | 0.043   |
| Use of continuous positive airway pressure (yes vs no)            | 1.76(0.69;4.48)  | 0.240   |
| Nutritional status (malnourished vs no)                           | 1.69(0.66;4.3)   | 0.272   |
| Nutritional status (obese vs no)                                  | 1.89(0.63;5.71)  | 0.261   |
| Chest X-ray or CT (multiple or bilateral opacities vs no opacity) | 3.57(1.14;11.2)  | 0.030   |
| Chest X-ray or CT (single opacity vs no opacity)                  | 2.96(0.89;9.81)  | 0.077   |
| C-reactive protein (for each mg/dl)                               | 1.03(0.98;1.08)  | 0.230   |

OR= Odds Ratio

CI = Confidence Intervals

CT = Computed Tomography
